# Supplementary material for: Silicalite-1/SPEEK composite membranes: influence of the zeolite particles loading or size on proton conductivity and water uptake
Source: Royal Society of Chemistry journal article supplement (doi:10.1039/c1nj20020h), 2011-01-01
Supplement: c1nj20020h.pdf [file c1nj20020h.pdf]

## Supplementary Information

**Figure S1:**  $^{29}\text{Si}$  MAS-NMR spectra of silicalite-1 samples SA1 and SA4 synthesized at 90 °C for a duration time of 24 h and a  $\text{H}_2\text{O}/\text{SiO}_2$  ratio of (a) 20.8 and (b) 251.7 using Sigma-Aldrich TPAOH.

**Figure S2:** (a) Specific surface area  $S_{\text{BET}}$  and (b) micropore volume (t-plot method) of the silicalite-1 particles as a function of the water/silica ratio.

**Figure S3:** Size distribution by intensity of scattered light, obtained by using DLS, represented for the silicalite-1 samples SA1, SA4 and SA5 synthesized at 90 °C for a duration time of 24 h and a  $\text{H}_2\text{O}/\text{SiO}_2$  ratio of (a) 20.8, (b) 251.7 and (c) 519.3.

**Figure S4:** Size distribution by intensity of scattered light, obtained by using DLS, represented for the silicalite-1 samples AA1, AA2 and AA4 synthesized at 90 °C with a  $\text{H}_2\text{O}/\text{SiO}_2$  ratio of 50 and a duration time of (a) 17.9, (b) 24 and (c) 48 h.

**Figure S5:** High-resolution TEM pictures of silicalite-1 samples SA1 and SA4 synthesized at 90 °C with a duration time of 24 h and a  $\text{H}_2\text{O}/\text{SiO}_2$  ratio of (top) 20.8 and (bottom) 251.7. Samples were synthesized using Sigma-Aldrich TPAOH.

**Figure S6:**  $^1\text{H}$  NMR spectra of sulfonated polyetheretherketone (SPEEK) polymers with a sulfonation degree of (a) 69.4 and (b) 85.0 %.

**Figure S7:** Representative pictures of silicalite-1/SPEEK nanocomposite membranes prepared with (a) 2.24 wt% and 85%, (b) 7.30 wt% and 69.4% and (c) 14.89 wt% and 69.4% for the zeolite particles content and the polymer DS, respectively (Sample AA2, particles size  $155 \pm 50$  nm).

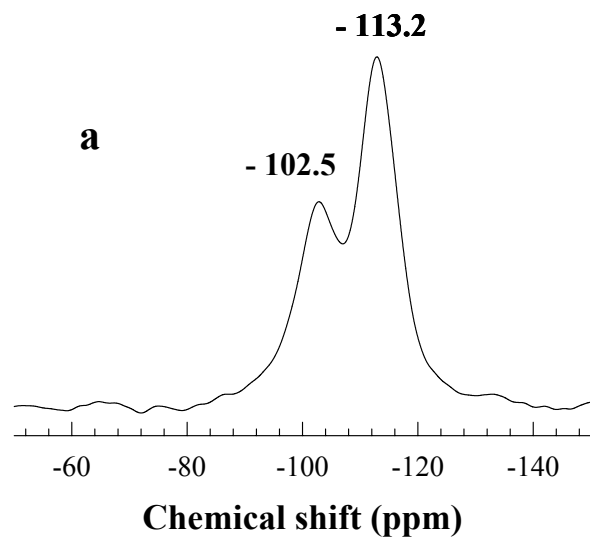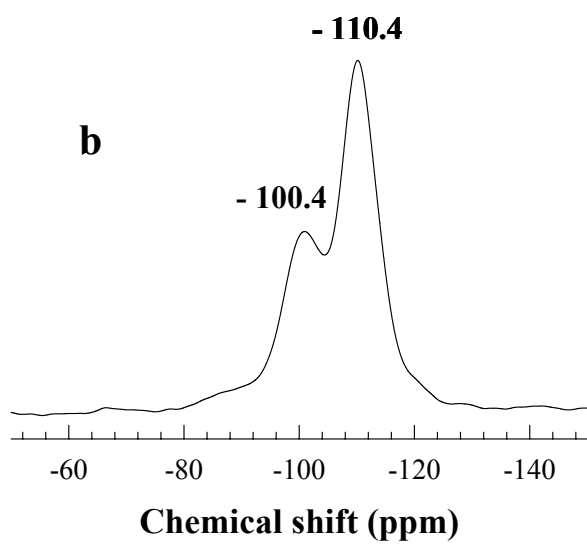

Figure S1

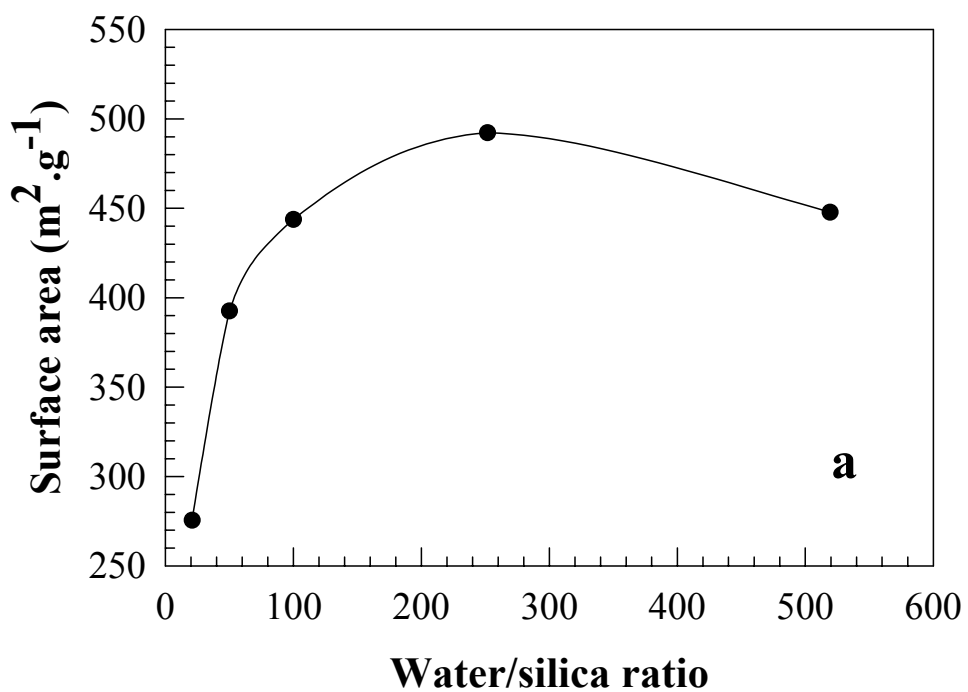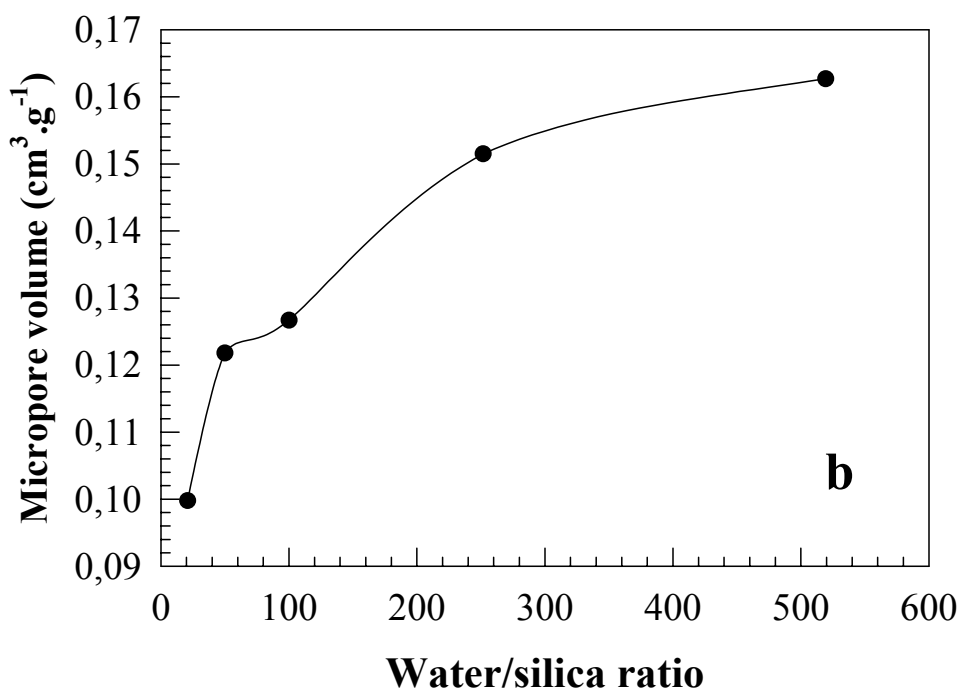

Figure S2

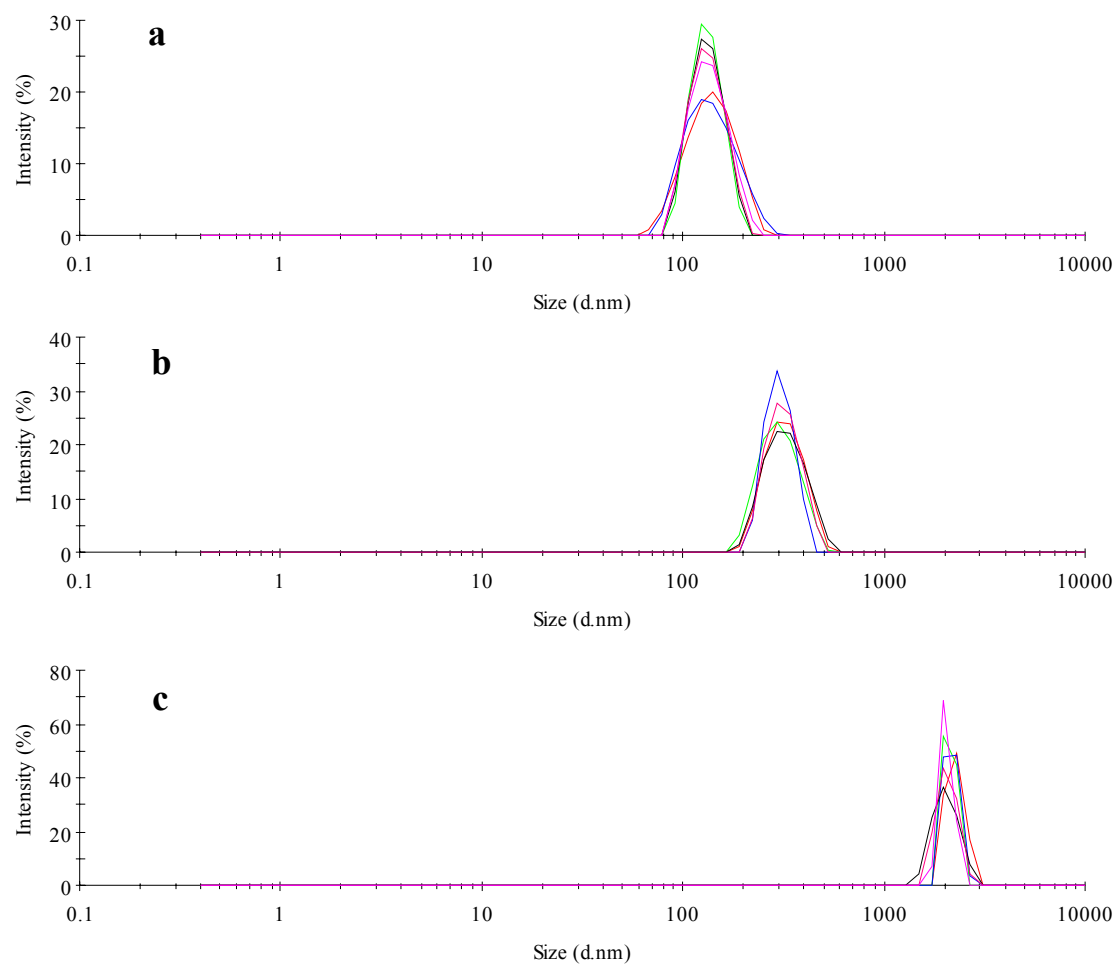

Figure S3

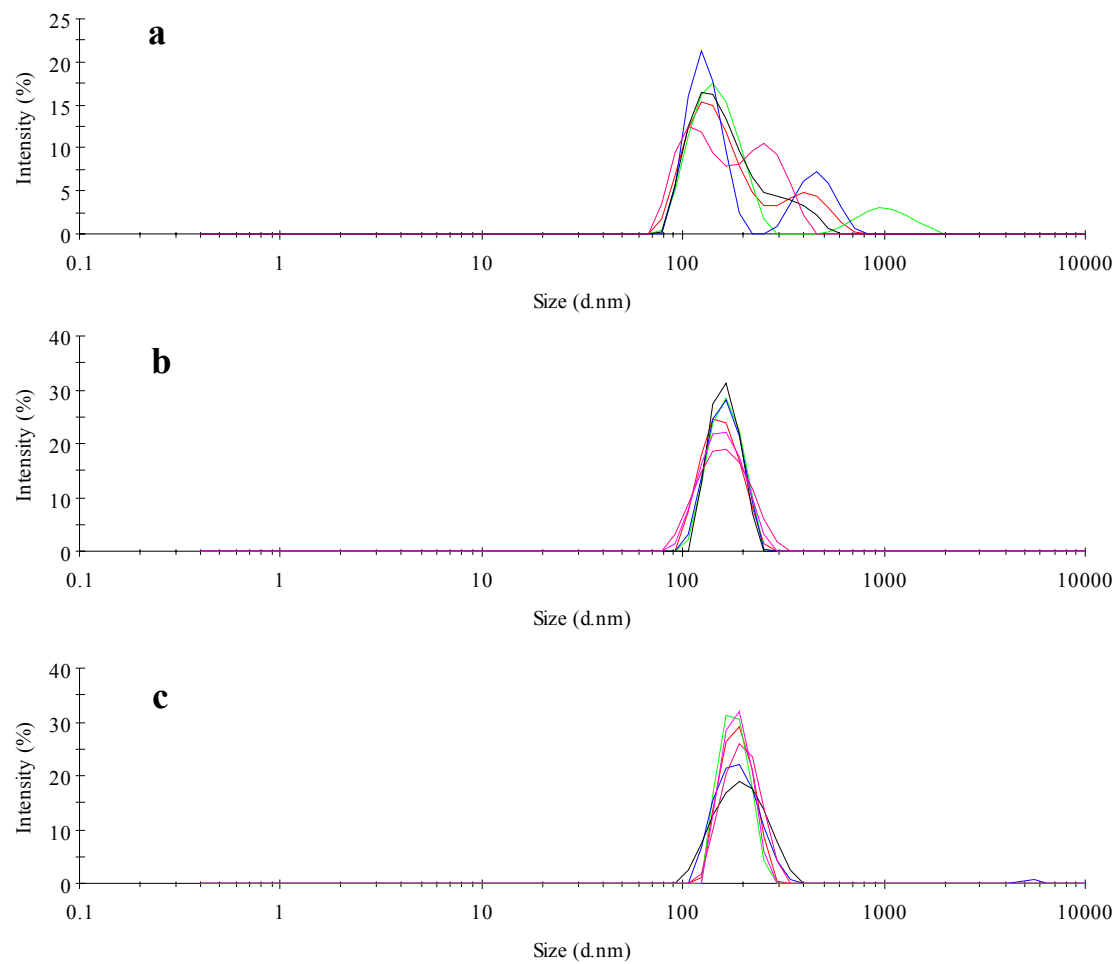

Figure S4

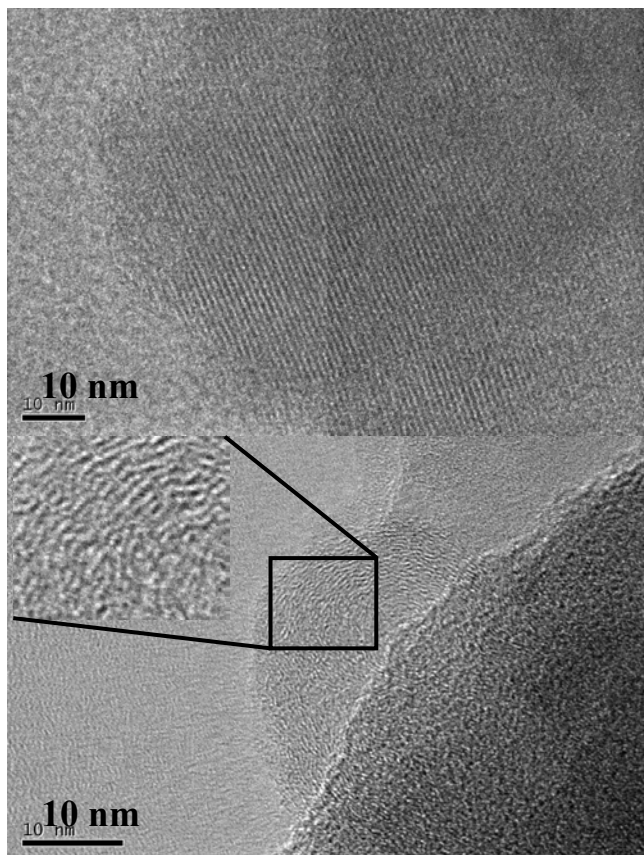

Figure S5

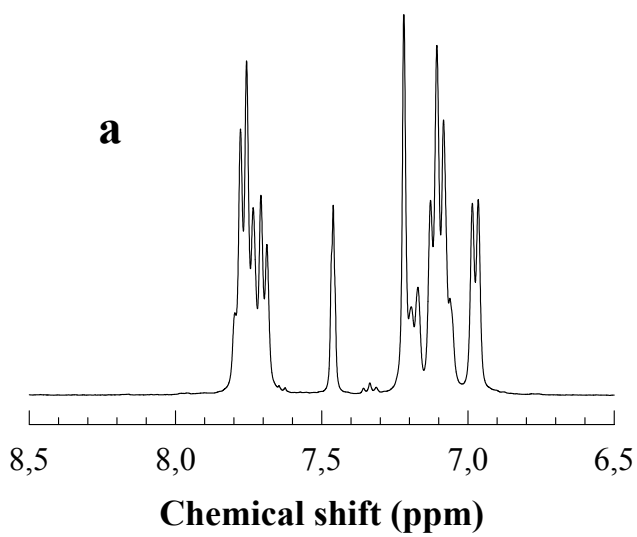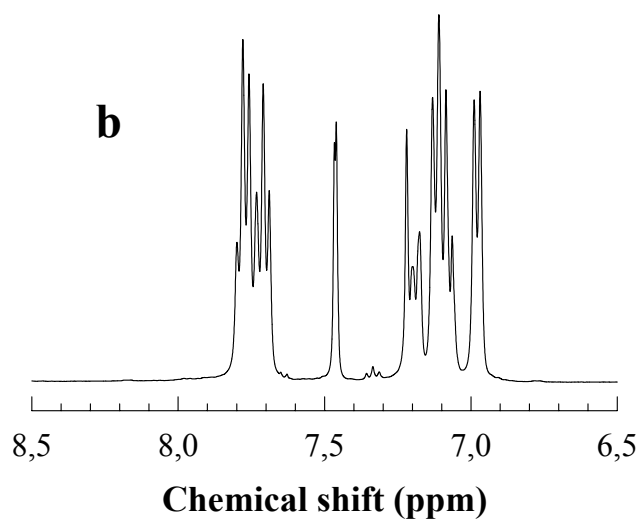

**Figure S6**

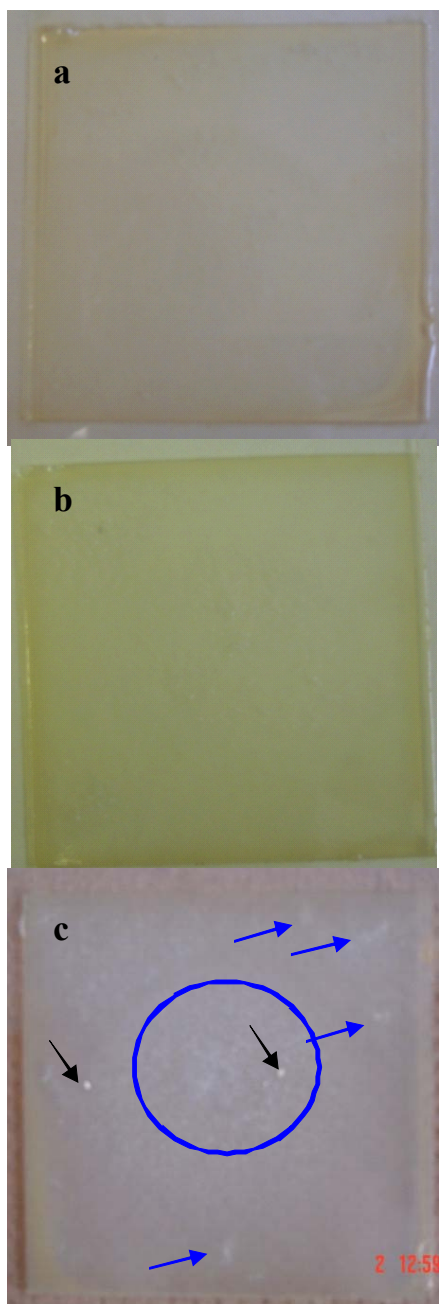

Figure S7
